# Supplementary material for: Changes in Cardiovascular Health in the United States, 2003–2011
Source: PubMed Central journal article supplement — J Am Heart Assoc. 2015 Sep 22;4(9):e001650. doi: 10.1161/JAHA.114.001650 (PMC4599487; doi:10.1161/jaha.114.001650), 2015-09-22
Supplement: jah30004-e001650-sd1.pdf [file jah30004-e001650-sd1.pdf]

## SUPPLEMENTAL MATERIAL

Changes in Cardiovascular Health in the United States, 2003-2011

**Authors and Affiliations:** Courtney S. Pilkerton, BA<sup>1,2,3</sup>, Sarah S. Singh, MD, MPH<sup>1,2,3</sup>, Thomas K. Bias, PhD<sup>2,4</sup>, and Stephanie J. Frisbee, PhD<sup>2,3</sup>

<sup>1</sup>School of Medicine, West Virginia University, Morgantown, WV

<sup>2</sup>School of Public Health, West Virginia University, Morgantown, WV

<sup>3</sup>Center for Cardiovascular and Respiratory Sciences, West Virginia University Robert C. Byrd Health Sciences Center, Morgantown, WV

<sup>4</sup>Health Research Center, West Virginia University Robert C. Byrd Health Sciences Center, Morgantown, WV

<sup>5</sup>Center for Basic and Translational Stroke Research, West Virginia University Robert C. Byrd Health Sciences Center, Morgantown, WV

**Table S1.** Age-standardized mean overall CVHI and percent of population with “poor” and “ideal” CVHI stratified by state and year, 2003-2011

| State       |                                 | 2003  | 2003 95% CI |       | 2005  | 2005 95% CI |       | 2007  | 2007 95% CI |       | 2009  | 2009 95% CI |       | 2011  | 2011 95% CI |       |
|-------------|---------------------------------|-------|-------------|-------|-------|-------------|-------|-------|-------------|-------|-------|-------------|-------|-------|-------------|-------|
| Alabama     | Mean CVHI                       | 3.52  | 3.46        | 3.58  | 3.55  | 3.49        | 3.62  | 3.50  | 3.45        | 3.55  | 3.47  | 3.39        | 3.55  | 3.20  | 3.15        | 3.25  |
|             | % of Population w/ “Poor” CVHI  | 21.1% | 19.3%       | 23.2% | 18.9% | 17.0%       | 21.0% | 20.9% | 19.5%       | 22.4% | 24.9% | 22.7%       | 27.2% | 29.0% | 27.3%       | 30.8% |
|             | % of Population w/ “Ideal” CVHI | 3.4%  | 2.6%        | 4.5%  | 3.6%  | 2.4%        | 5.3%  | 2.6%  | 2.0%        | 3.4%  | 4.2%  | 2.5%        | 6.8%  | 1.0%  | 0.7%        | 1.5%  |
| Alaska      | Mean CVHI                       | 3.77  | 3.69        | 3.84  | 3.78  | 3.69        | 3.86  | 3.59  | 3.49        | 3.69  | 3.63  | 3.55        | 3.72  | 3.48  | 3.40        | 3.55  |
|             | % of Population w/ “Poor” CVHI  | 13.7% | 11.7%       | 16.0% | 15.2% | 13.0%       | 17.7% | 17.5% | 14.5%       | 21.1% | 16.9% | 14.6%       | 19.4% | 21.6% | 19.5%       | 23.9% |
|             | % of Population w/ “Ideal” CVHI | 4.7%  | 3.4%        | 6.6%  | 6.1%  | 4.1%        | 9.0%  | 4.3%  | 3.0%        | 6.1%  | 3.4%  | 2.3%        | 5.0%  | 2.3%  | 1.7%        | 3.2%  |
| Arizona     | Mean CVHI                       | 3.76  | 3.67        | 3.84  | 3.78  | 3.67        | 3.88  | 3.65  | 3.52        | 3.77  | 3.68  | 3.55        | 3.81  | 3.54  | 3.46        | 3.62  |
|             | % of Population w/ “Poor” CVHI  | 13.9% | 12.0%       | 16.1% | 14.9% | 12.8%       | 17.3% | 18.5% | 14.7%       | 23.1% | 20.8% | 17.6%       | 24.5% | 21.6% | 19.3%       | 24.1% |
|             | % of Population w/ “Ideal” CVHI | 5.6%  | 3.7%        | 8.3%  | 5.7%  | 4.4%        | 7.5%  | 6.3%  | 4.8%        | 8.4%  | 8.8%  | 5.6%        | 13.7% | 3.9%  | 2.7%        | 5.7%  |
| Arkansas    | Mean CVHI                       | 3.66  | 3.60        | 3.71  | 3.63  | 3.57        | 3.68  | 3.58  | 3.51        | 3.65  | 3.54  | 3.46        | 3.61  | 3.27  | 3.19        | 3.36  |
|             | % of Population w/ “Poor” CVHI  | 18.0% | 16.5%       | 19.6% | 18.2% | 16.8%       | 19.7% | 19.9% | 18.1%       | 21.9% | 20.7% | 18.7%       | 22.9% | 27.1% | 24.7%       | 29.7% |
|             | % of Population w/ “Ideal” CVHI | 4.3%  | 3.3%        | 5.5%  | 3.8%  | 2.9%        | 4.9%  | 5.5%  | 4.0%        | 7.4%  | 2.9%  | 2.0%        | 4.1%  | 1.9%  | 0.9%        | 3.9%  |
| California  | Mean CVHI                       | 3.87  | 3.82        | 3.92  | 3.85  | 3.80        | 3.90  | 3.88  | 3.82        | 3.93  | 3.78  | 3.75        | 3.81  | 3.64  | 3.61        | 3.68  |
|             | % of Population w/ “Poor” CVHI  | 13.4% | 12.1%       | 14.8% | 14.1% | 12.8%       | 15.5% | 14.9% | 13.3%       | 16.6% | 15.4% | 14.6%       | 16.2% | 18.7% | 17.7%       | 19.7% |
|             | % of Population w/ “Ideal” CVHI | 7.3%  | 6.3%        | 8.5%  | 7.9%  | 6.8%        | 9.2%  | 7.1%  | 6.0%        | 8.4%  | 6.8%  | 6.1%        | 7.6%  | 3.7%  | 3.2%        | 4.3%  |
| Colorado    | Mean CVHI                       | 3.93  | 3.88        | 3.98  | 3.89  | 3.84        | 3.94  | 3.88  | 3.85        | 3.92  | 3.87  | 3.83        | 3.92  | 3.70  | 3.66        | 3.74  |
|             | % of Population w/ “Poor” CVHI  | 11.3% | 10.1%       | 12.7% | 12.8% | 11.7%       | 14.0% | 13.3% | 12.5%       | 14.1% | 13.3% | 12.1%       | 14.6% | 16.2% | 15.1%       | 17.3% |
|             | % of Population w/ “Ideal” CVHI | 6.7%  | 5.5%        | 8.0%  | 6.5%  | 5.4%        | 7.9%  | 7.4%  | 6.4%        | 8.5%  | 6.6%  | 5.5%        | 7.9%  | 4.4%  | 3.7%        | 5.2%  |
| Connecticut | Mean CVHI                       | 3.92  | 3.88        | 3.96  | 3.84  | 3.79        | 3.90  | 3.78  | 3.71        | 3.85  | 3.79  | 3.73        | 3.85  | 3.62  | 3.56        | 3.68  |
|             | % of Population w/ “Poor” CVHI  | 12.0% | 10.9%       | 13.1% | 13.3% | 12.1%       | 14.5% | 15.9% | 14.3%       | 17.6% | 15.4% | 13.6%       | 17.3% | 18.4% | 16.8%       | 20.2% |
|             | % of Population w/ “Ideal” CVHI | 7.0%  | 5.9%        | 8.2%  | 5.9%  | 4.8%        | 7.2%  | 6.1%  | 5.0%        | 7.5%  | 6.2%  | 5.0%        | 7.5%  | 4.6%  | 3.6%        | 5.9%  |
| DC          | Mean CVHI                       | 3.81  | 3.74        | 3.88  | 3.80  | 3.73        | 3.86  | 3.78  | 3.72        | 3.85  | 3.86  | 3.80        | 3.92  | 3.56  | 3.48        | 3.64  |
|             | % of Population w/ “Poor” CVHI  | 15.3% | 13.4%       | 17.5% | 17.4% | 15.5%       | 19.5% | 17.7% | 15.9%       | 19.6% | 15.1% | 13.7%       | 16.5% | 22.1% | 19.8%       | 24.6% |
|             | % of Population w/ “Ideal” CVHI | 5.5%  | 4.4%        | 6.9%  | 6.4%  | 5.2%        | 7.8%  | 7.0%  | 5.6%        | 8.6%  | 6.8%  | 5.6%        | 8.3%  | 4.9%  | 3.7%        | 6.4%  |
| Delaware    | Mean CVHI                       | 3.65  | 3.59        | 3.71  | 3.60  | 3.54        | 3.66  | 3.60  | 3.54        | 3.67  | 3.70  | 3.63        | 3.76  | 3.39  | 3.32        | 3.46  |
|             | % of Population w/ “Poor” CVHI  | 17.6% | 15.9%       | 19.4% | 19.8% | 18.1%       | 21.6% | 19.3% | 17.7%       | 21.1% | 17.8% | 16.2%       | 19.6% | 24.4% | 22.5%       | 26.4% |
|             | % of Population w/ “Ideal” CVHI | 4.7%  | 3.7%        | 6.0%  | 5.4%  | 4.0%        | 7.2%  | 4.2%  | 2.8%        | 6.3%  | 4.9%  | 3.7%        | 6.3%  | 3.5%  | 2.0%        | 6.0%  |
| Florida     | Mean CVHI                       | 3.67  | 3.61        | 3.73  | 3.69  | 3.65        | 3.74  | 3.68  | 3.64        | 3.72  | 3.65  | 3.58        | 3.71  | 3.42  | 3.37        | 3.46  |
|             | % of Population w/ “Poor” CVHI  | 17.7% | 15.8%       | 19.7% | 17.3% | 16.0%       | 18.7% | 16.6% | 15.5%       | 17.8% | 18.5% | 16.7%       | 20.4% | 22.5% | 21.0%       | 24.1% |
|             | % of Population w/ “Ideal” CVHI | 3.8%  | 2.9%        | 5.0%  | 4.7%  | 3.9%        | 5.7%  | 5.0%  | 4.3%        | 5.7%  | 5.7%  | 4.3%        | 7.5%  | 2.6%  | 2.0%        | 3.4%  |
| Georgia     | Mean CVHI                       | 3.63  | 3.59        | 3.68  | 3.66  | 3.60        | 3.71  | 3.60  | 3.55        | 3.65  | 3.63  | 3.57        | 3.69  | 3.40  | 3.35        | 3.45  |
|             | % of Population w/ “Poor” CVHI  | 19.1% | 17.7%       | 20.5% | 16.9% | 15.5%       | 18.3% | 20.3% | 19.0%       | 21.7% | 18.9% | 17.5%       | 20.3% | 25.2% | 23.7%       | 26.7% |
|             | % of Population w/ “Ideal” CVHI | 4.1%  | 3.4%        | 5.0%  | 3.9%  | 3.1%        | 5.0%  | 4.8%  | 4.0%        | 5.8%  | 3.7%  | 2.8%        | 5.0%  | 2.5%  | 1.7%        | 3.7%  |

| State         |                                 | 2003  | 2003 95% CI |       | 2005  | 2005 95% CI |       | 2007  | 2007 95% CI |       | 2009  | 2009 95% CI |       | 2011  | 2011 95% CI |       |
|---------------|---------------------------------|-------|-------------|-------|-------|-------------|-------|-------|-------------|-------|-------|-------------|-------|-------|-------------|-------|
| Hawaii        | Mean CVHI                       | 3.95  | 3.90        | 4.01  | 3.87  | 3.81        | 3.92  | 3.86  | 3.81        | 3.91  | 3.73  | 3.67        | 3.79  | 3.61  | 3.56        | 3.67  |
|               | % of Population w/ "Poor" CVHI  | 12.0% | 10.7%       | 13.5% | 12.1% | 10.9%       | 13.4% | 13.7% | 12.3%       | 15.2% | 15.7% | 14.2%       | 17.2% | 17.8% | 16.2%       | 19.6% |
|               | % of Population w/ "Ideal" CVHI | 6.7%  | 5.5%        | 8.1%  | 6.0%  | 4.6%        | 7.7%  | 6.9%  | 5.9%        | 8.1%  | 6.4%  | 5.0%        | 8.1%  | 3.7%  | 2.8%        | 5.0%  |
| Idaho         | Mean CVHI                       | 3.82  | 3.77        | 3.87  | 3.75  | 3.70        | 3.80  | 3.72  | 3.66        | 3.78  | 3.74  | 3.67        | 3.81  | 3.52  | 3.46        | 3.58  |
|               | % of Population w/ "Poor" CVHI  | 14.5% | 13.2%       | 15.9% | 16.5% | 15.1%       | 17.9% | 16.5% | 15.1%       | 18.0% | 16.2% | 14.7%       | 17.8% | 20.3% | 18.7%       | 22.1% |
|               | % of Population w/ "Ideal" CVHI | 5.1%  | 4.2%        | 6.2%  | 5.7%  | 4.6%        | 7.1%  | 7.2%  | 5.5%        | 9.4%  | 7.5%  | 5.6%        | 9.8%  | 2.6%  | 1.8%        | 3.7%  |
| Illinois      | Mean CVHI                       | 3.74  | 3.68        | 3.81  | 3.68  | 3.63        | 3.73  | 3.67  | 3.62        | 3.72  | 3.65  | 3.59        | 3.71  | 3.45  | 3.39        | 3.51  |
|               | % of Population w/ "Poor" CVHI  | 14.7% | 13.0%       | 16.6% | 16.6% | 15.3%       | 18.1% | 17.5% | 16.2%       | 18.7% | 17.4% | 16.1%       | 18.8% | 22.6% | 20.7%       | 24.7% |
|               | % of Population w/ "Ideal" CVHI | 4.8%  | 3.7%        | 6.3%  | 4.2%  | 3.4%        | 5.2%  | 5.2%  | 4.1%        | 6.7%  | 5.0%  | 3.8%        | 6.4%  | 3.7%  | 2.8%        | 5.0%  |
| Indiana       | Mean CVHI                       | 3.66  | 3.62        | 3.71  | 3.58  | 3.53        | 3.63  | 3.60  | 3.54        | 3.65  | 3.49  | 3.44        | 3.55  | 3.33  | 3.28        | 3.38  |
|               | % of Population w/ "Poor" CVHI  | 17.7% | 16.4%       | 19.0% | 19.0% | 17.6%       | 20.5% | 18.7% | 17.3%       | 20.3% | 21.1% | 19.8%       | 22.6% | 24.9% | 23.5%       | 26.5% |
|               | % of Population w/ "Ideal" CVHI | 4.6%  | 3.7%        | 5.7%  | 4.2%  | 3.3%        | 5.5%  | 4.4%  | 3.4%        | 5.7%  | 3.8%  | 2.7%        | 5.3%  | 1.6%  | 1.2%        | 2.1%  |
| Iowa          | Mean CVHI                       | 3.76  | 3.71        | 3.80  | 3.72  | 3.67        | 3.78  | 3.66  | 3.61        | 3.72  | 3.65  | 3.59        | 3.71  | 3.50  | 3.46        | 3.55  |
|               | % of Population w/ "Poor" CVHI  | 13.8% | 12.7%       | 15.1% | 15.4% | 14.0%       | 16.8% | 16.8% | 15.5%       | 18.2% | 17.2% | 15.5%       | 18.9% | 19.7% | 18.3%       | 21.1% |
|               | % of Population w/ "Ideal" CVHI | 3.6%  | 2.7%        | 4.8%  | 4.7%  | 3.5%        | 6.2%  | 3.1%  | 2.5%        | 3.8%  | 3.9%  | 2.7%        | 5.6%  | 2.6%  | 2.0%        | 3.4%  |
| Kansas        | Mean CVHI                       | 3.75  | 3.70        | 3.80  | 3.73  | 3.69        | 3.77  | 3.64  | 3.60        | 3.69  | 3.60  | 3.57        | 3.63  | 3.43  | 3.40        | 3.46  |
|               | % of Population w/ "Poor" CVHI  | 14.2% | 12.7%       | 15.7% | 14.5% | 13.5%       | 15.5% | 17.6% | 16.3%       | 19.1% | 17.8% | 17.0%       | 18.5% | 23.0% | 22.1%       | 23.9% |
|               | % of Population w/ "Ideal" CVHI | 3.6%  | 2.8%        | 4.6%  | 3.9%  | 3.1%        | 4.8%  | 4.3%  | 3.4%        | 5.5%  | 3.2%  | 2.7%        | 3.7%  | 2.9%  | 2.4%        | 3.5%  |
| Kentucky      | Mean CVHI                       | 3.42  | 3.36        | 3.48  | 3.43  | 3.38        | 3.48  | 3.40  | 3.35        | 3.45  | 3.41  | 3.35        | 3.47  | 3.23  | 3.17        | 3.28  |
|               | % of Population w/ "Poor" CVHI  | 22.7% | 20.8%       | 24.7% | 21.9% | 20.4%       | 23.6% | 22.4% | 20.7%       | 24.2% | 25.1% | 23.3%       | 26.9% | 28.7% | 27.0%       | 30.5% |
|               | % of Population w/ "Ideal" CVHI | 2.7%  | 1.8%        | 3.9%  | 1.6%  | 1.2%        | 2.2%  | 1.8%  | 1.3%        | 2.5%  | 2.9%  | 2.2%        | 3.9%  | 1.5%  | 1.0%        | 2.3%  |
| Louisiana     | Mean CVHI                       | 3.58  | 3.54        | 3.63  | 3.61  | 3.56        | 3.67  | 3.52  | 3.46        | 3.58  | 3.48  | 3.43        | 3.52  | 3.16  | 3.12        | 3.21  |
|               | % of Population w/ "Poor" CVHI  | 19.2% | 17.7%       | 20.7% | 17.9% | 16.2%       | 19.7% | 21.7% | 20.0%       | 23.6% | 22.7% | 21.4%       | 24.0% | 29.7% | 28.0%       | 31.3% |
|               | % of Population w/ "Ideal" CVHI | 3.7%  | 2.9%        | 4.7%  | 3.5%  | 2.5%        | 4.8%  | 4.4%  | 3.2%        | 6.1%  | 3.5%  | 2.6%        | 4.8%  | 1.1%  | 0.6%        | 1.9%  |
| Maine         | Mean CVHI                       | 3.76  | 3.69        | 3.83  | 3.78  | 3.72        | 3.85  | 3.68  | 3.62        | 3.74  | 3.75  | 3.71        | 3.80  | 3.47  | 3.43        | 3.51  |
|               | % of Population w/ "Poor" CVHI  | 15.4% | 13.5%       | 17.5% | 15.1% | 13.7%       | 16.7% | 17.7% | 15.9%       | 19.5% | 16.7% | 15.6%       | 17.8% | 22.0% | 20.9%       | 23.2% |
|               | % of Population w/ "Ideal" CVHI | 5.3%  | 4.0%        | 6.9%  | 6.7%  | 5.3%        | 8.5%  | 5.8%  | 4.6%        | 7.2%  | 6.4%  | 5.2%        | 7.9%  | 3.3%  | 2.7%        | 4.1%  |
| Maryland      | Mean CVHI                       | 3.80  | 3.74        | 3.85  | 3.77  | 3.73        | 3.82  | 3.67  | 3.62        | 3.71  | 3.68  | 3.64        | 3.73  | 3.50  | 3.45        | 3.54  |
|               | % of Population w/ "Poor" CVHI  | 14.6% | 13.3%       | 16.2% | 14.9% | 13.8%       | 15.9% | 17.4% | 16.2%       | 18.6% | 18.0% | 16.7%       | 19.4% | 21.8% | 20.5%       | 23.3% |
|               | % of Population w/ "Ideal" CVHI | 6.7%  | 5.3%        | 8.4%  | 5.8%  | 4.8%        | 6.9%  | 5.4%  | 4.3%        | 6.8%  | 5.0%  | 4.1%        | 6.2%  | 3.5%  | 2.7%        | 4.5%  |
| Massachusetts | Mean CVHI                       | 3.90  | 3.86        | 3.94  | 3.82  | 3.78        | 3.87  | 3.82  | 3.79        | 3.85  | 3.79  | 3.76        | 3.83  | 3.61  | 3.57        | 3.64  |
|               | % of Population w/ "Poor" CVHI  | 12.6% | 11.6%       | 13.7% | 13.3% | 12.3%       | 14.4% | 14.6% | 13.9%       | 15.4% | 14.9% | 14.0%       | 15.8% | 18.4% | 17.4%       | 19.4% |
|               | % of Population w/ "Ideal" CVHI | 6.5%  | 5.5%        | 7.6%  | 6.1%  | 5.1%        | 7.3%  | 6.5%  | 5.5%        | 7.6%  | 5.4%  | 4.7%        | 6.3%  | 3.2%  | 2.7%        | 3.8%  |
| Michigan      | Mean CVHI                       | 3.61  | 3.56        | 3.67  | 3.64  | 3.60        | 3.67  | 3.61  | 3.57        | 3.66  | 3.62  | 3.57        | 3.66  | 3.36  | 3.31        | 3.41  |

| State                 |                                 | 2003  | 2003 95% CI |       | 2005  | 2005 95% CI |       | 2007  | 2007 95% CI |       | 2009  | 2009 95% CI |       | 2011  | 2011 95% CI |       |
|-----------------------|---------------------------------|-------|-------------|-------|-------|-------------|-------|-------|-------------|-------|-------|-------------|-------|-------|-------------|-------|
|                       |                                 |       |             |       |       |             |       |       |             |       |       |             |       |       |             |       |
|                       | % of Population w/ "Poor" CVHI  | 18.5% | 17.0%       | 20.1% | 18.5% | 17.6%       | 19.4% | 19.3% | 18.0%       | 20.6% | 19.6% | 18.4%       | 20.8% | 25.7% | 24.2%       | 27.2% |
|                       | % of Population w/ "Ideal" CVHI | 4.5%  | 3.4%        | 5.8%  | 4.3%  | 3.7%        | 5.0%  | 3.5%  | 2.8%        | 4.3%  | 5.9%  | 4.6%        | 7.5%  | 3.2%  | 2.5%        | 4.1%  |
|                       | Mean CVHI                       | 3.79  | 3.74        | 3.83  | 3.79  | 3.73        | 3.86  | 3.80  | 3.75        | 3.85  | 3.79  | 3.73        | 3.85  | 3.59  | 3.55        | 3.63  |
| <b>Minnesota</b>      | % of Population w/ "Poor" CVHI  | 12.7% | 11.6%       | 14.0% | 14.1% | 12.6%       | 15.8% | 13.5% | 12.4%       | 14.7% | 13.8% | 12.3%       | 15.5% | 18.6% | 17.4%       | 19.8% |
|                       | % of Population w/ "Ideal" CVHI | 4.6%  | 3.6%        | 5.8%  | 5.7%  | 4.2%        | 7.6%  | 3.9%  | 2.9%        | 5.3%  | 4.8%  | 3.8%        | 6.0%  | 3.2%  | 2.6%        | 3.9%  |
|                       | Mean CVHI                       | 3.47  | 3.42        | 3.52  | 3.45  | 3.39        | 3.51  | 3.43  | 3.38        | 3.49  | 3.37  | 3.33        | 3.42  | 3.15  | 3.10        | 3.19  |
| <b>Mississippi</b>    | % of Population w/ "Poor" CVHI  | 20.7% | 19.1%       | 22.5% | 22.6% | 20.9%       | 24.3% | 22.0% | 20.4%       | 23.7% | 23.9% | 22.7%       | 25.1% | 29.7% | 28.1%       | 31.4% |
|                       | % of Population w/ "Ideal" CVHI | 3.1%  | 2.3%        | 4.3%  | 2.4%  | 1.7%        | 3.4%  | 2.7%  | 2.0%        | 3.8%  | 2.7%  | 1.9%        | 3.7%  | 0.9%  | 0.6%        | 1.3%  |
|                       | Mean CVHI                       | 3.68  | 3.61        | 3.75  | 3.60  | 3.54        | 3.66  | 3.58  | 3.51        | 3.66  | 3.62  | 3.55        | 3.70  | 3.38  | 3.31        | 3.44  |
| <b>Missouri</b>       | % of Population w/ "Poor" CVHI  | 16.7% | 14.7%       | 18.8% | 18.4% | 16.7%       | 20.1% | 19.5% | 17.3%       | 21.8% | 17.7% | 16.1%       | 19.4% | 24.2% | 22.3%       | 26.1% |
|                       | % of Population w/ "Ideal" CVHI | 5.2%  | 3.8%        | 7.1%  | 4.7%  | 3.6%        | 6.0%  | 5.2%  | 3.7%        | 7.2%  | 4.1%  | 2.7%        | 6.2%  | 2.1%  | 1.5%        | 3.0%  |
|                       | Mean CVHI                       | 3.95  | 3.90        | 4.01  | 3.86  | 3.80        | 3.92  | 3.83  | 3.77        | 3.89  | 3.80  | 3.74        | 3.86  | 3.61  | 3.56        | 3.66  |
| <b>Montana</b>        | % of Population w/ "Poor" CVHI  | 11.2% | 9.9%        | 12.6% | 11.3% | 10.1%       | 12.6% | 14.3% | 13.0%       | 15.6% | 14.9% | 13.6%       | 16.3% | 18.9% | 17.6%       | 20.3% |
|                       | % of Population w/ "Ideal" CVHI | 7.1%  | 5.5%        | 9.1%  | 5.6%  | 4.3%        | 7.1%  | 6.2%  | 4.7%        | 8.1%  | 5.5%  | 4.5%        | 6.7%  | 3.6%  | 2.8%        | 4.5%  |
|                       | Mean CVHI                       | 3.75  | 3.70        | 3.80  | 3.67  | 3.63        | 3.72  | 3.70  | 3.63        | 3.78  | 3.72  | 3.66        | 3.77  | 3.51  | 3.48        | 3.54  |
| <b>Nebraska</b>       | % of Population w/ "Poor" CVHI  | 14.3% | 12.9%       | 15.9% | 16.1% | 14.9%       | 17.4% | 17.3% | 15.6%       | 19.1% | 17.0% | 15.6%       | 18.4% | 20.7% | 19.9%       | 21.6% |
|                       | % of Population w/ "Ideal" CVHI | 4.1%  | 3.3%        | 5.2%  | 4.1%  | 3.2%        | 5.2%  | 4.5%  | 3.2%        | 6.3%  | 5.4%  | 3.9%        | 7.4%  | 2.9%  | 2.5%        | 3.4%  |
|                       | Mean CVHI                       | 3.65  | 3.57        | 3.73  | 3.73  | 3.64        | 3.82  | 3.68  | 3.61        | 3.76  | 3.59  | 3.49        | 3.68  | 3.44  | 3.35        | 3.53  |
| <b>Nevada</b>         | % of Population w/ "Poor" CVHI  | 16.2% | 14.2%       | 18.6% | 18.1% | 15.7%       | 20.8% | 18.4% | 16.3%       | 20.6% | 19.5% | 17.0%       | 22.2% | 23.2% | 20.4%       | 26.2% |
|                       | % of Population w/ "Ideal" CVHI | 4.4%  | 3.2%        | 5.9%  | 6.7%  | 4.6%        | 9.6%  | 5.0%  | 3.4%        | 7.3%  | 5.0%  | 3.5%        | 7.2%  | 2.9%  | 2.0%        | 4.3%  |
|                       | Mean CVHI                       | 3.86  | 3.81        | 3.91  | 3.80  | 3.76        | 3.85  | 3.74  | 3.69        | 3.79  | 3.75  | 3.69        | 3.81  | 3.58  | 3.52        | 3.63  |
| <b>New Hampshire</b>  | % of Population w/ "Poor" CVHI  | 13.4% | 12.0%       | 14.8% | 14.3% | 13.3%       | 15.4% | 15.9% | 14.6%       | 17.3% | 16.2% | 14.8%       | 17.7% | 20.0% | 18.5%       | 21.5% |
|                       | % of Population w/ "Ideal" CVHI | 6.7%  | 5.6%        | 8.1%  | 5.8%  | 4.7%        | 7.2%  | 4.4%  | 3.8%        | 5.2%  | 6.9%  | 5.5%        | 8.5%  | 5.1%  | 3.8%        | 6.7%  |
|                       | Mean CVHI                       | 3.78  | 3.75        | 3.81  | 3.74  | 3.70        | 3.78  | 3.71  | 3.65        | 3.77  | 3.76  | 3.72        | 3.80  | 3.49  | 3.46        | 3.53  |
| <b>New Jersey</b>     | % of Population w/ "Poor" CVHI  | 15.1% | 14.1%       | 16.0% | 15.7% | 14.6%       | 16.8% | 17.2% | 15.9%       | 18.6% | 15.9% | 14.9%       | 17.0% | 20.0% | 18.9%       | 21.2% |
|                       | % of Population w/ "Ideal" CVHI | 4.5%  | 4.0%        | 5.2%  | 5.1%  | 4.4%        | 5.8%  | 5.1%  | 3.7%        | 7.0%  | 5.8%  | 4.9%        | 6.8%  | 2.9%  | 2.3%        | 3.6%  |
|                       | Mean CVHI                       | 3.89  | 3.84        | 3.94  | 3.77  | 3.72        | 3.82  | 3.74  | 3.69        | 3.79  | 3.74  | 3.69        | 3.80  | 3.51  | 3.46        | 3.56  |
| <b>New Mexico</b>     | % of Population w/ "Poor" CVHI  | 11.8% | 10.7%       | 13.1% | 13.8% | 12.6%       | 15.1% | 15.6% | 14.3%       | 17.0% | 15.3% | 14.1%       | 16.5% | 20.5% | 19.1%       | 22.0% |
|                       | % of Population w/ "Ideal" CVHI | 6.4%  | 5.3%        | 7.7%  | 4.5%  | 3.5%        | 5.9%  | 4.7%  | 3.7%        | 5.9%  | 5.4%  | 4.1%        | 7.1%  | 2.7%  | 2.0%        | 3.6%  |
|                       | Mean CVHI                       | 3.76  | 3.71        | 3.81  | 3.73  | 3.68        | 3.77  | 3.70  | 3.65        | 3.75  | 3.69  | 3.64        | 3.74  | 3.52  | 3.47        | 3.57  |
| <b>New York</b>       | % of Population w/ "Poor" CVHI  | 15.3% | 14.1%       | 16.6% | 16.3% | 15.0%       | 17.7% | 17.1% | 15.9%       | 18.4% | 17.3% | 16.0%       | 18.6% | 21.7% | 20.3%       | 23.2% |
|                       | % of Population w/ "Ideal" CVHI | 5.5%  | 4.5%        | 6.6%  | 5.2%  | 4.1%        | 6.5%  | 5.3%  | 4.4%        | 6.3%  | 4.6%  | 3.6%        | 5.8%  | 3.6%  | 2.8%        | 4.6%  |
|                       | Mean CVHI                       | 3.60  | 3.55        | 3.64  | 3.57  | 3.54        | 3.60  | 3.53  | 3.49        | 3.57  | 3.54  | 3.49        | 3.59  | 3.40  | 3.36        | 3.45  |
| <b>North Carolina</b> | % of Population w/ "Poor" CVHI  | 18.0% | 16.7%       | 19.4% | 19.0% | 18.2%       | 19.8% | 20.9% | 19.9%       | 21.9% | 21.8% | 20.4%       | 23.2% | 24.0% | 22.6%       | 25.5% |

| State          |                                 | 2003  | 2003 95% CI |       | 2005  | 2005 95% CI |       | 2007  | 2007 95% CI |       | 2009  | 2009 95% CI |       | 2011  | 2011 95% CI |       |
|----------------|---------------------------------|-------|-------------|-------|-------|-------------|-------|-------|-------------|-------|-------|-------------|-------|-------|-------------|-------|
|                |                                 |       |             |       |       |             |       |       |             |       |       |             |       |       |             |       |
|                | % of Population w/ "Ideal" CVHI | 3.7%  | 2.8%        | 4.8%  | 3.4%  | 2.9%        | 4.0%  | 3.7%  | 2.9%        | 4.6%  | 4.1%  | 3.1%        | 5.4%  | 2.1%  | 1.6%        | 2.7%  |
| North Dakota   | Mean CVHI                       | 3.72  | 3.67        | 3.78  | 3.73  | 3.67        | 3.79  | 3.69  | 3.63        | 3.75  | 3.71  | 3.65        | 3.76  | 3.51  | 3.46        | 3.56  |
|                | % of Population w/ "Poor" CVHI  | 14.2% | 12.6%       | 15.9% | 14.6% | 13.1%       | 16.3% | 15.9% | 14.2%       | 17.6% | 16.3% | 15.1%       | 17.6% | 19.5% | 17.9%       | 21.1% |
|                | % of Population w/ "Ideal" CVHI | 4.5%  | 3.4%        | 6.1%  | 3.8%  | 2.8%        | 5.1%  | 3.3%  | 2.3%        | 4.8%  | 5.5%  | 4.1%        | 7.3%  | 1.9%  | 1.4%        | 2.6%  |
| Ohio           | Mean CVHI                       | 3.69  | 3.63        | 3.75  | 3.68  | 3.63        | 3.74  | 3.58  | 3.53        | 3.63  | 3.49  | 3.43        | 3.54  | 3.36  | 3.30        | 3.41  |
|                | % of Population w/ "Poor" CVHI  | 16.0% | 14.1%       | 18.0% | 16.2% | 14.9%       | 17.5% | 19.7% | 18.5%       | 21.0% | 22.5% | 20.6%       | 24.5% | 24.9% | 23.1%       | 26.8% |
|                | % of Population w/ "Ideal" CVHI | 4.7%  | 3.7%        | 6.1%  | 4.7%  | 3.6%        | 6.1%  | 4.8%  | 3.5%        | 6.6%  | 4.1%  | 3.1%        | 5.4%  | 2.4%  | 1.8%        | 3.1%  |
| Oklahoma       | Mean CVHI                       | 3.58  | 3.54        | 3.62  | 3.48  | 3.44        | 3.53  | 3.44  | 3.38        | 3.49  | 3.41  | 3.36        | 3.46  | 3.27  | 3.21        | 3.32  |
|                | % of Population w/ "Poor" CVHI  | 17.5% | 16.3%       | 18.7% | 21.1% | 19.8%       | 22.5% | 23.2% | 21.6%       | 24.8% | 23.8% | 22.3%       | 25.3% | 28.1% | 26.5%       | 29.7% |
|                | % of Population w/ "Ideal" CVHI | 2.2%  | 1.8%        | 2.8%  | 3.0%  | 2.3%        | 4.0%  | 2.7%  | 1.9%        | 3.7%  | 2.6%  | 1.5%        | 4.2%  | 2.5%  | 1.7%        | 3.8%  |
| Oregon         | Mean CVHI                       | 3.82  | 3.76        | 3.88  | 3.82  | 3.78        | 3.85  | 3.77  | 3.70        | 3.83  | 3.74  | 3.67        | 3.82  | 3.58  | 3.51        | 3.64  |
|                | % of Population w/ "Poor" CVHI  | 14.9% | 13.4%       | 16.6% | 14.1% | 13.3%       | 15.0% | 15.9% | 14.2%       | 17.9% | 16.7% | 14.9%       | 18.8% | 19.3% | 17.7%       | 21.0% |
|                | % of Population w/ "Ideal" CVHI | 5.9%  | 4.7%        | 7.3%  | 6.2%  | 5.5%        | 6.9%  | 4.7%  | 3.7%        | 5.9%  | 5.5%  | 4.1%        | 7.3%  | 4.2%  | 3.1%        | 5.7%  |
| Pennsylvania   | Mean CVHI                       | 3.69  | 3.63        | 3.74  | 3.67  | 3.63        | 3.71  | 3.63  | 3.58        | 3.68  | 3.61  | 3.56        | 3.66  | 3.46  | 3.41        | 3.51  |
|                | % of Population w/ "Poor" CVHI  | 16.5% | 15.0%       | 18.2% | 17.0% | 15.9%       | 18.2% | 18.2% | 16.8%       | 19.6% | 18.9% | 17.6%       | 20.2% | 22.7% | 21.3%       | 24.1% |
|                | % of Population w/ "Ideal" CVHI | 5.0%  | 3.9%        | 6.4%  | 4.7%  | 3.8%        | 5.7%  | 3.9%  | 3.2%        | 4.8%  | 4.6%  | 3.5%        | 5.9%  | 2.7%  | 2.0%        | 3.6%  |
| Rhode Island   | Mean CVHI                       | 3.74  | 3.69        | 3.79  | 3.75  | 3.69        | 3.81  | 3.67  | 3.61        | 3.72  | 3.72  | 3.67        | 3.77  | 3.50  | 3.44        | 3.55  |
|                | % of Population w/ "Poor" CVHI  | 15.6% | 14.2%       | 17.2% | 15.3% | 13.9%       | 16.9% | 16.3% | 14.9%       | 17.8% | 15.9% | 14.6%       | 17.2% | 22.7% | 21.0%       | 24.5% |
|                | % of Population w/ "Ideal" CVHI | 5.4%  | 4.4%        | 6.6%  | 4.7%  | 3.7%        | 6.1%  | 3.9%  | 3.1%        | 4.8%  | 4.1%  | 3.4%        | 5.0%  | 3.3%  | 2.5%        | 4.3%  |
| South Carolina | Mean CVHI                       | 3.68  | 3.63        | 3.72  | 3.54  | 3.50        | 3.57  | 3.56  | 3.52        | 3.61  | 3.52  | 3.46        | 3.57  | 3.27  | 3.22        | 3.31  |
|                | % of Population w/ "Poor" CVHI  | 17.7% | 16.4%       | 19.1% | 20.9% | 19.8%       | 22.0% | 19.7% | 18.6%       | 20.9% | 20.5% | 19.0%       | 22.0% | 28.0% | 26.5%       | 29.6% |
|                | % of Population w/ "Ideal" CVHI | 4.1%  | 3.4%        | 4.9%  | 3.7%  | 2.9%        | 4.6%  | 3.6%  | 2.7%        | 4.7%  | 2.7%  | 1.8%        | 3.9%  | 1.8%  | 1.3%        | 2.5%  |
| South Dakota   | Mean CVHI                       | 3.75  | 3.70        | 3.80  | 3.70  | 3.66        | 3.75  | 3.67  | 3.62        | 3.73  | 3.64  | 3.57        | 3.70  | 3.47  | 3.40        | 3.54  |
|                | % of Population w/ "Poor" CVHI  | 14.3% | 13.1%       | 15.6% | 15.1% | 13.9%       | 16.3% | 16.3% | 14.8%       | 17.9% | 17.8% | 16.2%       | 19.4% | 22.5% | 20.2%       | 25.0% |
|                | % of Population w/ "Ideal" CVHI | 4.2%  | 3.2%        | 5.6%  | 3.4%  | 2.7%        | 4.3%  | 3.5%  | 2.5%        | 4.7%  | 4.0%  | 2.7%        | 5.9%  | 2.5%  | 1.4%        | 4.6%  |
| Tennessee      | Mean CVHI                       | 3.63  | 3.57        | 3.69  | 3.57  | 3.51        | 3.63  | 3.50  | 3.44        | 3.56  | 3.58  | 3.51        | 3.66  | 3.30  | 3.22        | 3.38  |
|                | % of Population w/ "Poor" CVHI  | 17.3% | 15.5%       | 19.3% | 19.5% | 18.0%       | 21.2% | 20.8% | 19.1%       | 22.6% | 18.5% | 16.8%       | 20.2% | 26.6% | 24.2%       | 29.2% |
|                | % of Population w/ "Ideal" CVHI | 3.9%  | 2.7%        | 5.7%  | 3.6%  | 2.6%        | 5.0%  | 3.1%  | 2.3%        | 4.3%  | 5.3%  | 3.5%        | 8.0%  | 1.2%  | 0.6%        | 2.4%  |
| Texas          | Mean CVHI                       | 3.68  | 3.64        | 3.73  | 3.68  | 3.63        | 3.72  | 3.62  | 3.59        | 3.66  | 3.58  | 3.53        | 3.63  | 3.35  | 3.29        | 3.40  |
|                | % of Population w/ "Poor" CVHI  | 16.9% | 15.7%       | 18.2% | 16.2% | 14.9%       | 17.6% | 19.3% | 18.4%       | 20.3% | 19.0% | 17.6%       | 20.5% | 25.4% | 23.7%       | 27.1% |
|                | % of Population w/ "Ideal" CVHI | 3.9%  | 3.2%        | 4.7%  | 4.3%  | 3.5%        | 5.3%  | 4.5%  | 3.8%        | 5.4%  | 4.3%  | 3.4%        | 5.4%  | 3.1%  | 2.4%        | 4.0%  |
| Utah           | Mean CVHI                       | 3.96  | 3.90        | 4.01  | 3.86  | 3.81        | 3.90  | 3.87  | 3.82        | 3.93  | 3.80  | 3.76        | 3.85  | 3.67  | 3.63        | 3.70  |
|                | % of Population w/ "Poor" CVHI  | 11.8% | 10.3%       | 13.4% | 13.4% | 12.2%       | 14.7% | 13.9% | 12.7%       | 15.2% | 14.8% | 13.8%       | 15.9% | 17.7% | 16.6%       | 19.0% |
|                | % of Population w/ "Ideal" CVHI | 6.4%  | 5.1%        | 8.1%  | 5.8%  | 4.8%        | 7.1%  | 6.2%  | 5.0%        | 7.6%  | 5.2%  | 4.4%        | 6.3%  | 4.0%  | 3.4%        | 4.7%  |

| State         |                                 | 2003  | 2003 95% CI |       | 2005  | 2005 95% CI |       | 2007  | 2007 95% CI |       | 2009  | 2009 95% CI |       | 2011  | 2011 95% CI |       |
|---------------|---------------------------------|-------|-------------|-------|-------|-------------|-------|-------|-------------|-------|-------|-------------|-------|-------|-------------|-------|
| Vermont       | Mean CVHI                       | 3.93  | 3.89        | 3.98  | 3.88  | 3.84        | 3.93  | 3.81  | 3.74        | 3.88  | 3.80  | 3.74        | 3.85  | 3.64  | 3.59        | 3.69  |
|               | % of Population w/ "Poor" CVHI  | 12.4% | 11.3%       | 13.6% | 13.0% | 12.0%       | 14.0% | 15.9% | 13.8%       | 18.3% | 14.2% | 12.8%       | 15.7% | 17.9% | 16.5%       | 19.3% |
|               | % of Population w/ "Ideal" CVHI | 7.8%  | 6.5%        | 9.2%  | 8.0%  | 6.8%        | 9.3%  | 7.2%  | 6.0%        | 8.6%  | 6.7%  | 5.5%        | 8.1%  | 4.6%  | 3.8%        | 5.7%  |
| Virginia      | Mean CVHI                       | 3.78  | 3.73        | 3.83  | 3.73  | 3.68        | 3.78  | 3.69  | 3.63        | 3.76  | 3.77  | 3.70        | 3.83  | 3.42  | 3.37        | 3.48  |
|               | % of Population w/ "Poor" CVHI  | 14.8% | 13.6%       | 16.2% | 15.9% | 14.6%       | 17.3% | 17.1% | 15.6%       | 18.7% | 16.4% | 15.0%       | 17.8% | 23.6% | 21.9%       | 25.5% |
|               | % of Population w/ "Ideal" CVHI | 5.9%  | 4.8%        | 7.1%  | 4.9%  | 4.0%        | 6.1%  | 5.4%  | 3.8%        | 7.4%  | 6.7%  | 5.0%        | 8.9%  | 2.2%  | 1.6%        | 2.9%  |
| Washington    | Mean CVHI                       | 3.81  | 3.78        | 3.84  | 3.81  | 3.78        | 3.84  | 3.78  | 3.75        | 3.81  | 3.71  | 3.68        | 3.75  | 3.54  | 3.49        | 3.59  |
|               | % of Population w/ "Poor" CVHI  | 14.2% | 13.5%       | 15.0% | 14.8% | 14.2%       | 15.5% | 16.1% | 15.4%       | 16.9% | 17.1% | 16.1%       | 18.0% | 21.7% | 20.2%       | 23.2% |
|               | % of Population w/ "Ideal" CVHI | 5.6%  | 5.0%        | 6.2%  | 6.0%  | 5.4%        | 6.7%  | 6.2%  | 5.5%        | 7.1%  | 5.5%  | 4.7%        | 6.3%  | 3.4%  | 2.6%        | 4.3%  |
| West Virginia | Mean CVHI                       | 3.53  | 3.47        | 3.58  | 3.46  | 3.39        | 3.52  | 3.47  | 3.40        | 3.53  | 3.38  | 3.33        | 3.44  | 3.15  | 3.09        | 3.20  |
|               | % of Population w/ "Poor" CVHI  | 20.8% | 18.9%       | 22.8% | 22.8% | 21.0%       | 24.7% | 22.1% | 20.4%       | 23.9% | 23.9% | 22.2%       | 25.6% | 28.5% | 26.8%       | 30.3% |
|               | % of Population w/ "Ideal" CVHI | 2.9%  | 2.2%        | 3.8%  | 4.2%  | 2.9%        | 5.9%  | 3.7%  | 2.6%        | 5.2%  | 3.2%  | 2.2%        | 4.6%  | 1.1%  | 0.7%        | 1.7%  |
| Wisconsin     | Mean CVHI                       | 3.78  | 3.73        | 3.83  | 3.70  | 3.65        | 3.75  | 3.76  | 3.70        | 3.81  | 3.76  | 3.69        | 3.82  | 3.53  | 3.45        | 3.61  |
|               | % of Population w/ "Poor" CVHI  | 13.8% | 12.5%       | 15.2% | 15.1% | 13.8%       | 16.5% | 15.7% | 14.5%       | 16.9% | 16.5% | 14.8%       | 18.5% | 21.3% | 18.8%       | 23.9% |
|               | % of Population w/ "Ideal" CVHI | 4.5%  | 3.7%        | 5.5%  | 4.9%  | 3.7%        | 6.3%  | 6.5%  | 5.0%        | 8.5%  | 4.2%  | 3.0%        | 5.9%  | 4.4%  | 3.1%        | 6.1%  |
| Wyoming       | Mean CVHI                       | 3.79  | 3.74        | 3.84  | 3.76  | 3.71        | 3.81  | 3.77  | 3.71        | 3.83  | 3.79  | 3.74        | 3.84  | 3.50  | 3.43        | 3.57  |
|               | % of Population w/ "Poor" CVHI  | 13.9% | 12.5%       | 15.4% | 14.1% | 12.9%       | 15.4% | 15.2% | 13.9%       | 16.7% | 16.1% | 14.7%       | 17.5% | 20.8% | 19.0%       | 22.7% |
|               | % of Population w/ "Ideal" CVHI | 6.3%  | 5.2%        | 7.5%  | 6.4%  | 5.2%        | 7.9%  | 7.0%  | 5.4%        | 9.0%  | 6.4%  | 5.0%        | 8.0%  | 3.5%  | 2.5%        | 5.1%  |
